# Supplementary material for: Patient Cost-Sharing and Utilization of Breast Cancer Diagnostic Imaging by Patients Undergoing Subsequent Testing After a Screening Mammogram
Source: PubMed Central journal article supplement (PMC10043745; doi:10.1001/jamanetworkopen.2023.4893), 2023-03-27
Supplement: jamanetwopen-e234893-s002.pdf [file jamanetwopen-e234893-s002.pdf]

## Data Sharing Statement

Hughes. Patient Cost-Sharing and Utilization of Breast Cancer Diagnostic Imaging by Patients Undergoing Subsequent Testing After a Screening Mammogram. *JAMA Netw Open*. Published March 27, 2023. doi:10.1001/jamanetworkopen.2023.4893

### Data

**Data available:** No

### Additional Information

**Explanation for why data not available:** Our data use agreement with Optum does not permit sharing of this 8GB database
